# Supplementary material for: Genome-wide identification of genes involved in the positive and negative regulation of acetic acid-induced programmed cell death in Saccharomyces cerevisiae
Source: PubMed Central journal article supplement (PMC4046756; doi:10.1186/1471-2164-14-838), 2013-11-28
Supplement: 12864_2013_5541_MOESM4_ESM.pdf [file 12864_2013_5541_MOESM4_ESM.pdf]

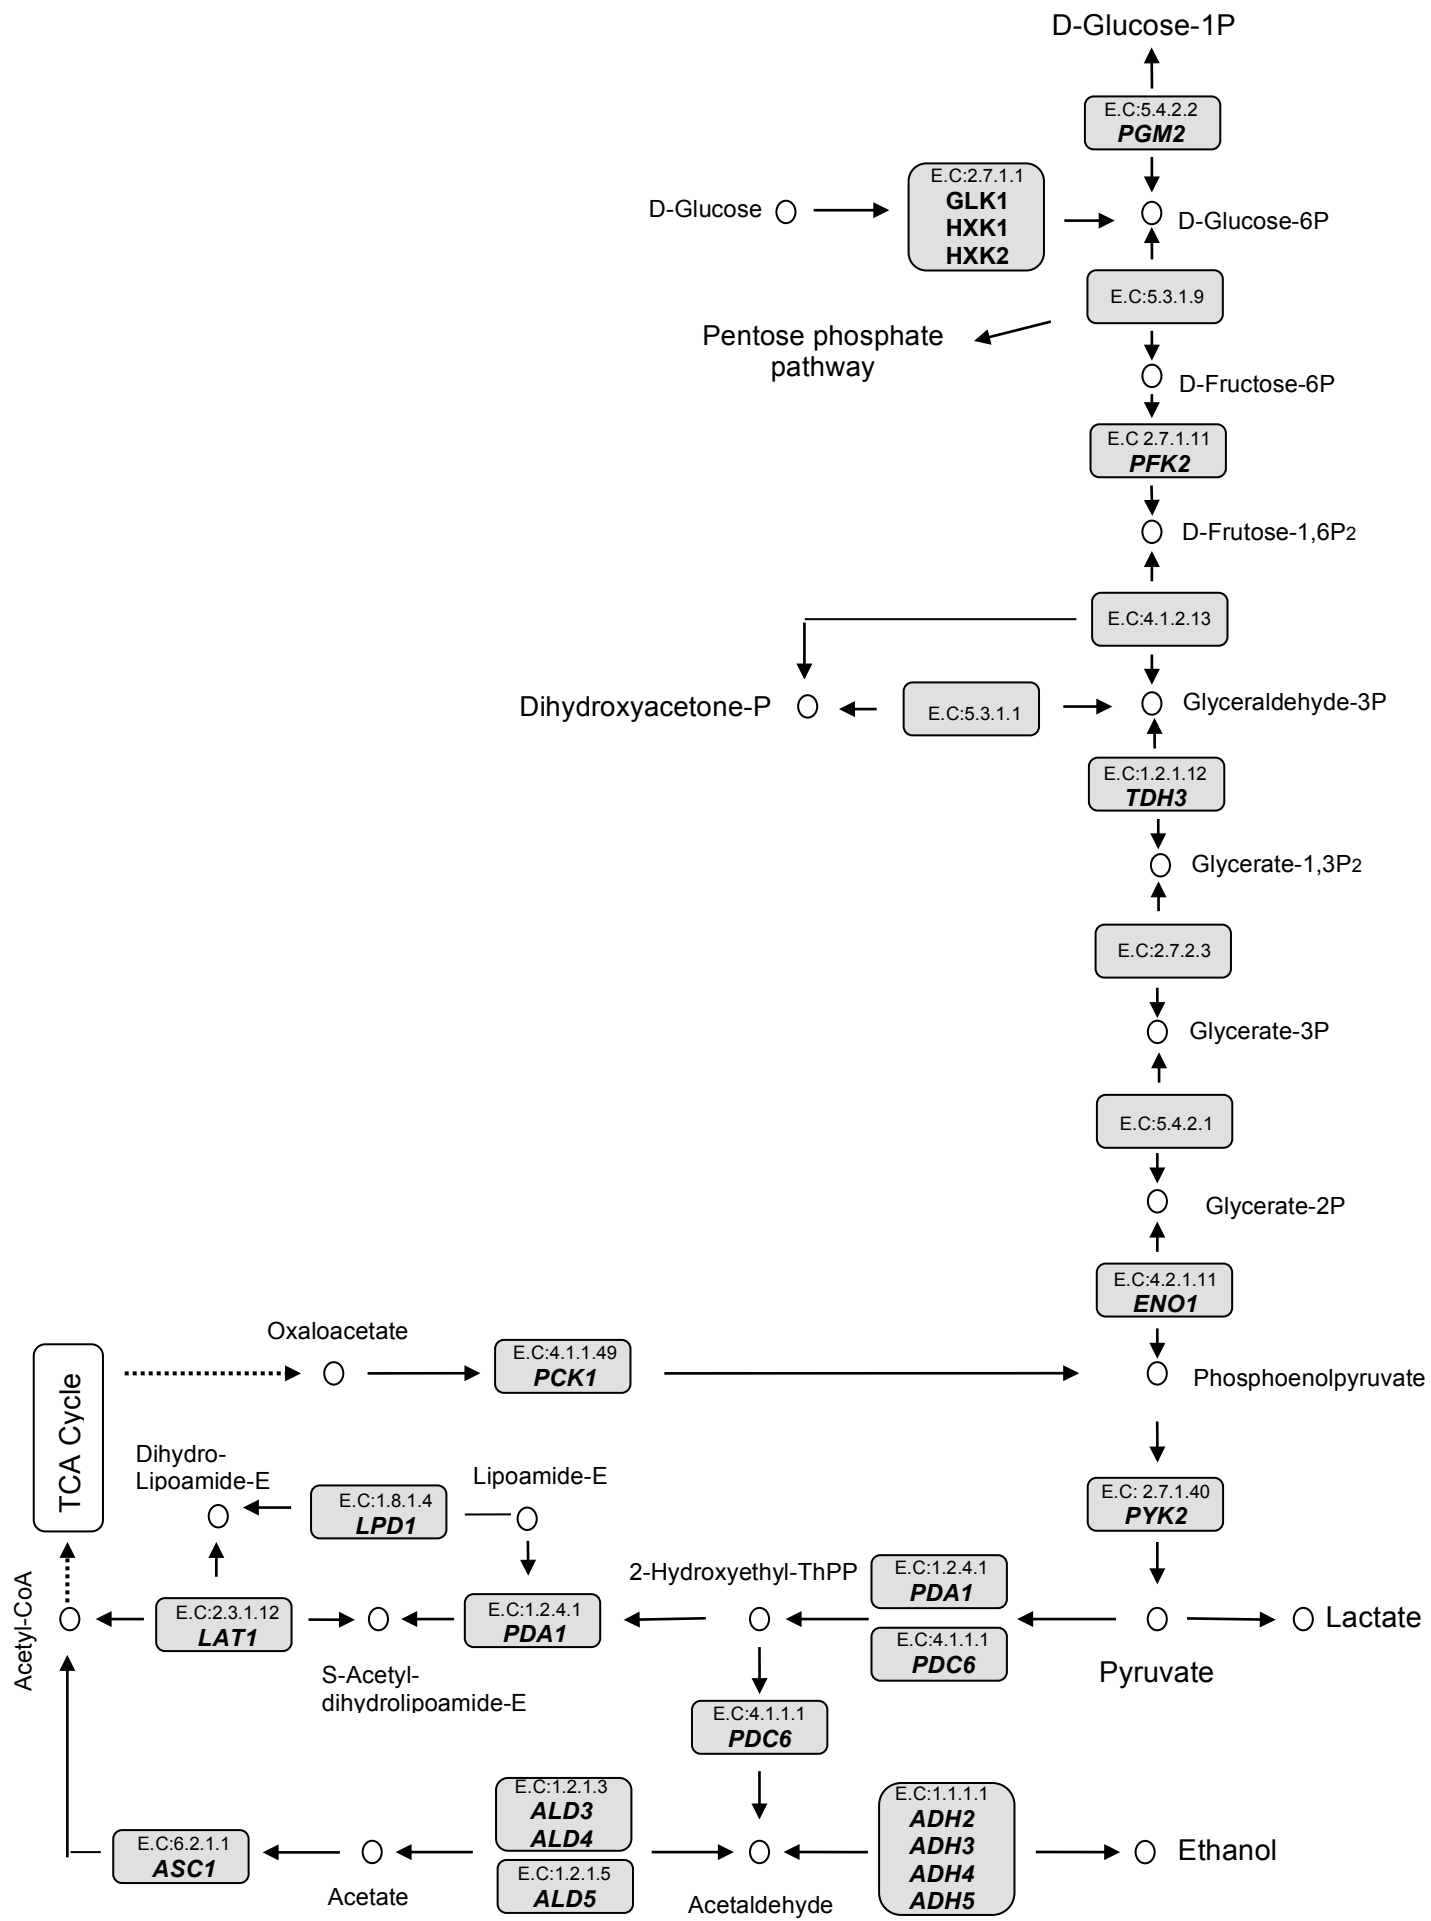

**Figure A3.** Schematic representation of metabolites, enzymes and genes from glycolysis/gluconeogenesis and fermentation. Deletion of the genes represented originated a higher resistant to acetic acid-induced PCD.

**Legend:**

EC:5.4.2.2 - Phosphoglucomutase

EC:2.7.1.1 - Hexokinase

EC:5.3.1.9 - Glucose-6-phosphate isomerase

EC:2.7.1.11 - 6-phosphofructokinase 1

EC:4.1.2.13 - Fructose-bisphosphate aldolase, class I

EC:5.3.1.1 - Triosephosphate isomerase (TIM)

EC:1.2.1.12 - Glyceraldehyde 3-phosphate dehydrogenase

EC:2.7.2.3 - Phosphoglycerate kinase

EC:5.4.2.1 - 2,3-bisphosphoglycerate-dependent phosphoglycerate mutase

EC:4.2.1.11 - Enolase

EC:2.7.1.40 - Pyruvate kinase

EC:4.1.1.49 - Phosphoenolpyruvate carboxykinase (ATP)

EC:1.2.4.1 - Pyruvate dehydrogenase E1 component

EC:1.8.1.4 - Dihydrolipoamide dehydrogenase

EC:2.3.1.12 - Pyruvate dehydrogenase E2 component (dihydrolipoamide acetyltransferase)

EC:4.1.1.1 - Pyruvate decarboxylase

EC:1.1.1.1 - Alcohol dehydrogenase 1/7

EC:1.2.1.3 - Aldehyde dehydrogenase (NAD<sup>+</sup>)

EC:1.2.1.5 - Aldehyde dehydrogenase (NAD(P)<sup>+</sup>)

EC:6.2.1.1 - Acetyl-CoA synthetase

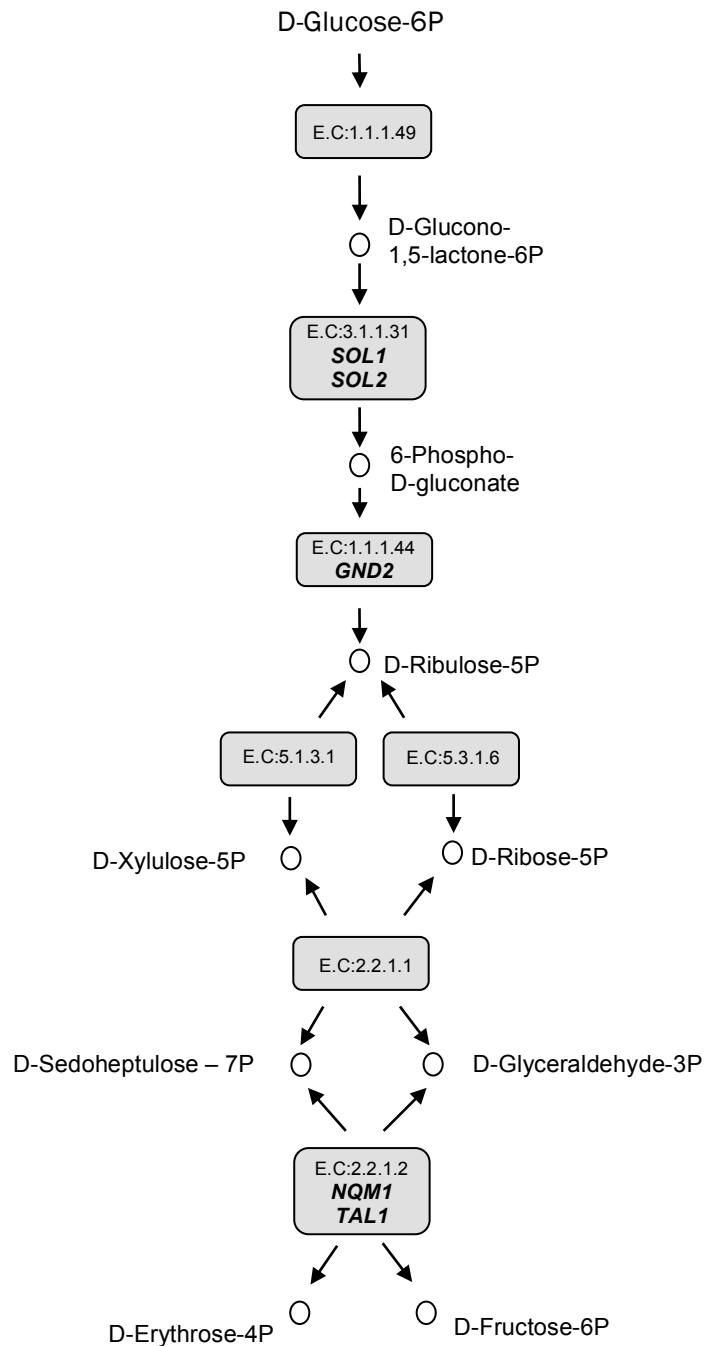

**Figure A4.** Schematic representation of metabolites, enzymes and genes from pentose-phosphate pathway. Deletion of the genes represented originated a higher resistant to acetic acid-induced PCD.

**Legend:**

**EC:1.1.1.49** - Glucose-6-phosphate 1-dehydrogenase

**EC:3.1.1.31** - 6-phosphogluconolactonase

**EC:1.1.1.44** - 6-phosphogluconate dehydrogenase

**EC:5.1.3.1** - Ribulose-phosphate 3-epimerase

**EC:5.3.1.6** - Ribose 5-phosphate isomerase A

**EC:2.2.1.2** - Transaldolase

**EC:2.2.1.1** - Transketolase

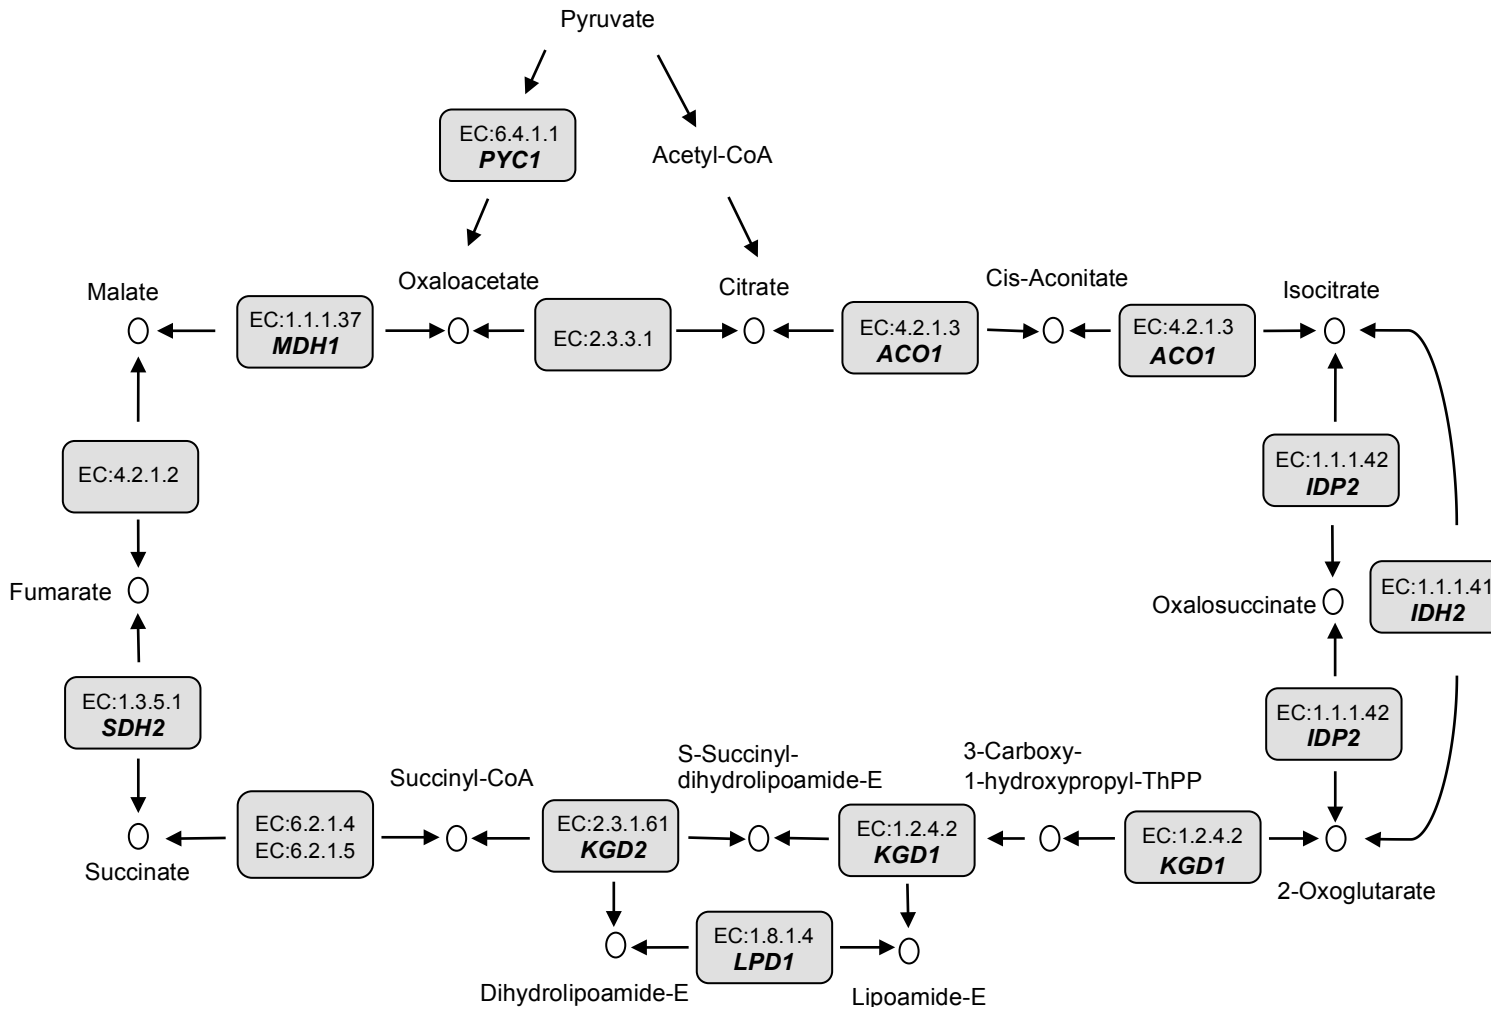

**Figure A5.** Schematic representation of metabolites, enzymes and genes from tricarboxylic acid cycle (TCA). Deletion of the genes represented originated a higher resistant to acetic acid-induced PCD.

**Legend:**

EC:6.4.1.1 - Pyruvate carboxylase

EC:1.1.1.37 - Malate dehydrogenase

EC:2.3.3.1 - Citrate synthase

EC:4.2.1.3 - Aconitate hydratase 1 / homoaconitase

EC:1.1.1.42 - Isocitrate dehydrogenase

EC:1.1.1.41 - Isocitrate dehydrogenase (NAD<sup>+</sup>)

EC:1.2.4.2 - 2-oxoglutarate dehydrogenase E1 component

EC:1.8.1.4 - Dihydrolipoamide dehydrogenase

EC:2.3.1.61 - 2-oxoglutarate dehydrogenase E2 component (dihydrolipoamide succinyltransferase)

**EC:6.2.1.4** - Succinyl-CoA synthetase alpha subunit

**EC:6.2.1.5** - Succinyl-CoA synthetase alpha subunit

**EC:1.3.5.1** - Succinate dehydrogenase (ubiquinone) flavoprotein subunit

**EC:4.2.1.2** - Fumarate hydratase, class I

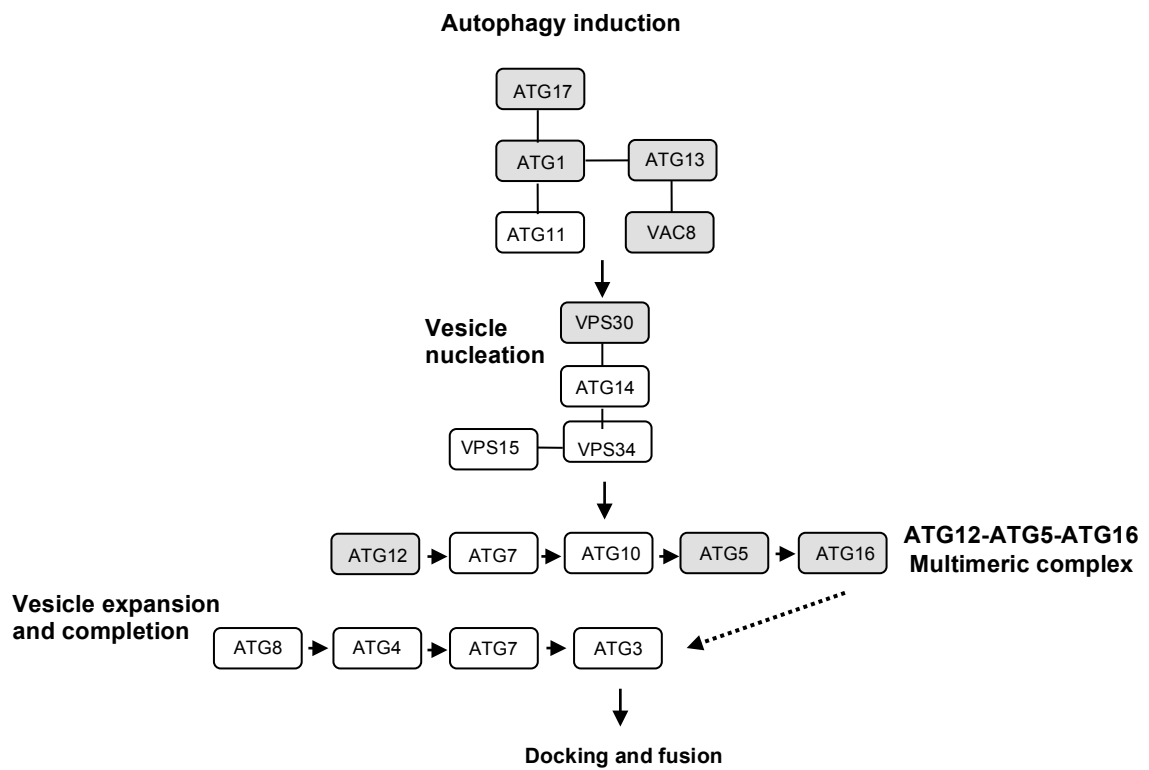

**Figure A6.** Schematic representation of genes involved in the regulation of autophagy and pre-autophagosomal formation. Deletion of the genes represented in grey originated a higher resistance to acetic acid-induced PCD.
